# Supplementary material for: Seasonal variation of fine and coarse-mode nitrates and related aerosols over East Asia: Synergetic observations and chemical transport model analysis
Source: Copernicus journal article supplement (doi:10.5194/acp-2017-447), 2017-07-05
Supplement: Supplementary file [file acp-2017-447-AC2-supplement.pdf]

## **Anonymous Referee #2**

The authors investigated inorganic particulate nitrate, ammonium, sulfate, and BC over an observation station at Fukuoka in East Asia using data from a 14-month observation and the corresponding GEOS-Chem model simulation. They analyzed the data over daily to seasonal variations and in fine and coarse mode particles, particularly for particulate nitrate. They also include the precursor gas tracers of NH<sub>3</sub> and HNO<sub>3</sub> in the discussion of their aerosol counterparts NH<sub>4</sub><sup>+</sup> and NO<sub>3</sub><sup>-</sup>, respectively. This is an interesting and valuable study. However, the analysis could be more logical and concise. The scientific accuracy of its statistical analysis is problematic. A major revision is required before the paper is published in ACP.

Thank you very much for your kind reviewing of our manuscript. We revised our paper based on two reviewer comments and provide a point-by-point response as below. We also removed the discussion of NH<sub>3</sub> and HNO<sub>3</sub> balancing for NO<sub>3</sub> formation, and revised the statistical analysis including the normalized mean bias (new Table1). The revisions are indicated in red in our revised manuscript. We hope our revisions are sufficient for your comments.

## **Major Comments**

2-A

It would be better to re-organize the discussion content and clearly point out the unique information shown by each figure. I feel it is a bit difficult to follow the discussion that jumps back forth among figures. For example, section 4.3.4 (monthly variation in total NO<sub>3</sub> and NH<sub>3</sub>) starts with a discussion on Figure 8 and follows up with Figure 5d, Figure 6a, and Figure 4a, c, d. I suggest merging Figure 3 and 4 together for daily variation and Figure 5 and 6 together for monthly variation. Please use monthly data to give seasonal and statistical findings and daily data to add any new findings on a daily time scale.

Reply: We re-organized the section 4. We also merge figures 3 and 4 as new Figure 3, and figures 5 and 6 as new Figure 4. We re-organized the discussion section in order to clarify the monthly (seasonal) variation of aerosols (this is our final purpose). However, the monthly mean value depends on the how much model can reproduce the intermittent (i.e., 1 – 2 times/ week) long-range transport from Asian continent to Japan, and sporadic dust transport. To show these intermittent and sporadic phenomena, we used the daily average concentration change (new Figure 3), and calculate the model statistics (add new Table 1 to show the model performance).

## 2-B

Another major concern is the scientific accuracy of the method used by the authors in explaining the relationship between model and observation based on the regression equation. For example, the authors concluded that the modeled PM<sub>2.5</sub> value is approximately 58% of the observed value because the data regression gives  $PM_{2.5}(\text{model}) = 0.58PM_{2.5}(\text{observation}) + 1.16$ . From my understanding, a slope of 0.58 does not necessarily lead to that conclusion. A slope that is less than 1 could be a natural phenomenon owing to the representation issue of the model and observation. The GEOS-Chem model data is an average value over a grid box of  $0.5^\circ \times 0.667^\circ$ , while the observation is conducted over a station. Consequently, it is hard for the model to capture the maximum and minimum observational values. In other words, the simulated model results tend to be underestimated at the high end and overestimated at the low end, which results in a slope less than 1. The authors need to modify their explanation of the model-observation relationship throughout the manuscript.

Reply: We revised the discussion mainly base on the Normalized Mean Bias (NMB) and other model statistics as shown in new Table 1. We also include the model representation issue into the text.

## Specific Comments

2-1. Abstract, lines 19-20 and lines 24-26 are duplicates.

Reply: Thanks. We corrected.

2-2. Page 4 line 19: What are the secondary inorganic aerosols considered for this study?

Reply: We included the component of secondary inorganic aerosols ( $\text{SO}_4$ ,  $\text{NO}_3$ ,  $\text{NH}_4$ ). As describe in text, we do not count secondary OC.

2-3. Page 5 line 27: Do  $\text{NH}_3$  emissions from agriculture and domestic animals belong to the emission of “anthropogenic emissions” mentioned here?

Reply: REAS  $\text{NH}_3$  inventory includes fertilizer application and livestock excreta. In our model sensitivity study, we reduce (20% reduction) all the emission intensity including  $\text{NH}_3$ . To remove the confusion, we reword “all emissions” instead of “anthropogenic emissions”.

2-4. Page 6 line 10: How does GEOS-Chem convert coarse-mode sea salt to  $\text{Na}^+$  concentration?

Reply: GEOS-Chem simulated coarse mode sea-salt mass concentration was converted to Na mass based on the salinity and Na mass ratio of sea water (Keene *et al.*, 1986).

Keene, W.C. A.A.P. Pszenny, J.N. Galloway, M.E. Hawley: Sea-salt corrections and interpretation of constituent ratios in marine precipitation, *J. Geophysical Research*, 91, 6646-6658, 1986.

2-5. Page 6 line 23 to Page 10 line 15: Reorganize the analysis as “Daily variation in  $\text{PM}_{2.5}$ ,  $\text{PM}_{10}$ , aerosol compositions and CO” and “Monthly variation in  $\text{PM}_{2.5}$  and aerosol composition”.

Reply: Please see the reply for 2-A. We clearly separated the

discussion for daily (for mainly model validation) and monthly mean variation.

- 2-6. Page 6 line 24: Please explain optical BC. What is its relationship with BC mass concentration?

Reply: Optical BC was measured by NIR light scattering method, and observed data had a good correlation with the IMPROVE protocol measurement (Hasegawa et al., 2004). We add this text in Section 2.1.

Hasegawa, S., S. Wakamatsu, K. Tanabe: Parallel measurement test of black carbon monitors, Proceeding of 21th Symposium on Aerosol Science and Technology, Japan Association of Aerosol Science and Technology, p. 7, 2004.

- 2-7. Page 6 line 25: What does “(2h)” mean here?

Reply: Sorry. This is our mistake. All the plot in Figures 3 and 4 are daily average. We corrected the manuscript.

- 2-8. Page 7 lines 9-14: Why do the authors show CO data in this paper? Is there any way to combine the analyses of CO and aerosols?

Reply: Please also see the reply for 1-6. We removed the discussion of CO from our revision.

- 2-9. Page 7 line 12: Why does is the high CO a product of long-range transport?

Reply: We removed this discussion.

- 2-10. Page 7 lines 21-25: Merge Figure 5 and 6 since they are both for monthly average data and NH<sub>4</sub> related to both SO<sub>4</sub> and NO<sub>3</sub>.

Reply: Thanks We merged Figure 5 & 6 and make new Figure 4.

- 2-11. Page 8 line 1: What does “intermittent high” mean here?

Reply: Long-range transport of SO<sub>4</sub> from Asian continent to Japan occurs once or twice / week during winter to early spring (It depends on synoptic weather changes). This occurs intermittently. We added a short description of this phenomena and reference.

- 2-12. Page 8 lines 3-4: What is the SF1? Why do the authors mention SF1 event specifically here? Figure 4a shows that the model completely misses the observed peak SO<sub>4</sub>.

Reply: SF1 event was used to identify the period of volcano impact is important for SO<sub>4</sub> level (please see Figures A1 and A2). In order to identify this meaning, we changed to "SVolc" in our revision. Because the volcanic emission is highly natural phenomena and hard to predict the day by day changes, so the modeled SO<sub>4</sub> level during SVolc misses the observed peak SO<sub>4</sub> (indicating the modeled SO<sub>2</sub> emission is under-estimated). We added some detailed explanation into the text and appendix.

- 2-13. Page 9 lines 3-4: Why is cNO<sub>3</sub> higher during fall?

Reply: This is due to the formation of sea-salt nitrate. We revised the text in order to explain this point.

- 2-14. Page 9 line 28: In sentence ". . . and NH<sub>3</sub> gas is also higher even in winter", "higher" than what?

Reply: Sorry for confusion. We revised this part as "NH<sub>3</sub> gas level exceeded 1 µg/m<sup>3</sup> (i.e., 0.4 ppb) even in winter".

- 2-15. Page 9 lines 29-31: How do T and precipitation influence NH<sub>3</sub>?

Reply: We revised our text as follows: The high NH<sub>3</sub> concentration (see Fig. 5d) in August 2015 (3 – 4 times higher than August 2014) might be due to differences in high temperature (monthly mean was 28.4°C, which is 1.7°C higher than 2014) and less precipitation (month total was 186mm, which is 228mm smaller than 2014). Roelle *et al.* (2002) indicated that the NH<sub>3</sub> emission from soil increased exponentially as

soil temperature increase, and more soil water due to precipitation filled the pores in the soil matrix and hinder the diffusion of  $\text{NH}_3$  from the soil to the air. Their results suggested that our observed meteorological conditions in each year can be the reasons for  $\text{NH}_3$  concentration variation.

Roelle, P. A., Aneja, V. P.: Characterization of Ammonia Emissions from Soils in the Upper Coastal Plain, North Carolina. *Atmos. Environ.*, **36**, 1087-1097 (2002)

- 2-16. Page 10 line 4: Using “decreased bias” here may be misleading. My understanding is that the missing emission in model results in an increased emission bias.

Reply: Thanks. We corrected.

- 2-17. Page 10 lines 4-9: How do you know that the  $\text{HNO}_3$ -high (-low) and  $\text{NH}_3$ -low (-high) relationship may retain the same equilibrium constant? Is there any evidence to support the authors’ conclusion? There are series of aqueous reactions between gases (i.e.  $\text{NH}_3$  and  $\text{HNO}_3$ ) and solid aerosol (i.e.  $\text{NH}_4\text{NO}_3$ ). In  $\text{NH}_3$  poor regime,  $\text{NH}_3$  emission cloud matters.

Reply: Thank you very much for your comment. We agreed this point, and removed this part of discussion from the text.

- 2-18. Figure 4b and c: Which of the two observation data shown in the figure does “Obs” in the regression equation refer to?

Reply: Daily averaged value from ACSA data was used to “Obs”. We identify this point into figure.

## Technique Corrections

- 2-T1. Abstract lines 21-24: Please change this to “Observational data confirmed that coarse  $\text{NO}_3$  ( $\text{cNO}_3$ ) made up the largest proportion (i.e.

40-55%) of total nitrate (defined as the sum of fNO<sub>3</sub>, cNO<sub>3</sub>, and HNO<sub>3</sub>) during the winter, while HNO<sub>3</sub> gas constituted approximately 40% of total nitrate in summer. fNO<sub>3</sub> peaked during the winter.”

2-T2. Abstract line 24: Change “A” to “The”.

2-T3. Page 4 line 14: Delete “the” before “a”

2-T4. Page 10 line 1: add “(Fig. 5d)” after “NH<sub>3</sub>” and add “(Fig. 6a)” after “HNO<sub>3</sub>”.

2-T5. Page 10 line 2: There is no figure Fig. 4d.

Reply: For all technique corrections, we corrected. Thank you very much for your kind helps.
